# Supplementary material
Source: PubMed Central journal article supplement (PMC3397336)
Supplement: supp_jn.112.162677_nut162677-STable_1-STable_2.pdf [file supp_jn.112.162677_nut162677-STable_1-STable_2.pdf]

**Supplemental Table 1: Composition of the non-purified diet<sup>1,2</sup>**

| Ingredient            | <i>g/kg diet</i> |
|-----------------------|------------------|
| Protein               | 225              |
| Fat                   | 54               |
| Cholesterol           | 0.195            |
| Fiber                 | 40               |
| Nitrogen-free extract | 520              |
| Vitamins              | 2                |
| Minerals              | 61               |

<sup>1</sup> Vitamins provided in the non-purified diet:

Vitamin A (acetate), 9.98 µg/g; carotene, trace-  
2.6 µg/g; Vitamin D<sub>3</sub> (cholecalciferol), 0.06  
µg/g; Vitamin E (dl-alpha tocopheryl acetate),  
75 mg/kg; Vitamin K (menadione), 1.9 mg/kg,  
Thiamin 10 mg/kg, Riboflavin, 14 mg/kg,  
Niacin, 63 mg/kg, Choline chloride 1600  
mg/kg, Folic acid, 1.2 mg/kg, Pyridoxine, 7.6  
mg/kg, Biotin, 0.38 mg/kg.

<sup>2</sup> Minerals provided in the diet; Calcium 1.00%,  
Phosphorus, 0.75%, Potassium 0.91%,  
Magnesium 0.24%, Sulfur, 0.26%, Sodium,  
0.26%, Chlorine, 0.44%, Fluorine, 16 mg/kg,  
Iron, 380 mg/kg, Zinc, 120 mg/kg, Manganese  
96 mg/kg, Copper, 12 mg/kg, Cobalt, 0.27  
mg/kg, Iodine, 0.98 mg/kg, Chromiumm 1.4  
mg/kg, Selenium, 0.21 mg/kg.

**Supplemental Table 2:** Primer pairs used in QPCR for the analysis of gene expression

| <b>Gene</b> | <b>Fwd (5'-3')</b>   | <b>Rev (5'-3')</b>    | <b>Length</b> | <b>Accession #</b> |
|-------------|----------------------|-----------------------|---------------|--------------------|
| Actb        | AACACAGTGCTGTCTGGTGG | GAAAGGGTGTAACGCAGC    | 278 bp        | NM_007393.3        |
| CmoI        | GAGCAAGTACAACCATTGGT | AACTCAGACACCACGATTC   | 147 bp        | NM_021486          |
| Lrp1        | ACAAGGACTGTACCGATGGC | GGTACTCACACTCAGGGGA   | 178 bp        | NM_008512.2        |
| Lpl         | CCCTAAGGACCCCTGAAGAC | GGCCCGATAACAACCAGTCTA | 227 bp        | NM_008509.2        |
| Ldlr        | GGATGTCGACTGTGTTGACG | GCACACTGGAATTCATCAGG  | 228 bp        | NM_010700.2        |
| Srb1        | TCCCTCATCAAGCAGCAGGT | TTCCACATCCCGAAGGACA   | 70 bp         | NM_016741.1        |

Efficiencies for each primer pair were determined using a standard curve with serial dilutions of 5-fold dilution using pooled control cDNA. QPCR efficiencies were obtained from the Roche Lightcycler 480.
